# Supplementary material
Source: PubMed Central journal article supplement (PMC4349064)
Supplement: 55c8bc0f8ba04f3c9d83b35630dc0245_genetics.114.173716-3.pdf [file 55c8bc0f8ba04f3c9d83b35630dc0245_genetics.114.173716-3.pdf]

**A**

## Improvement at All 3 Major Steps

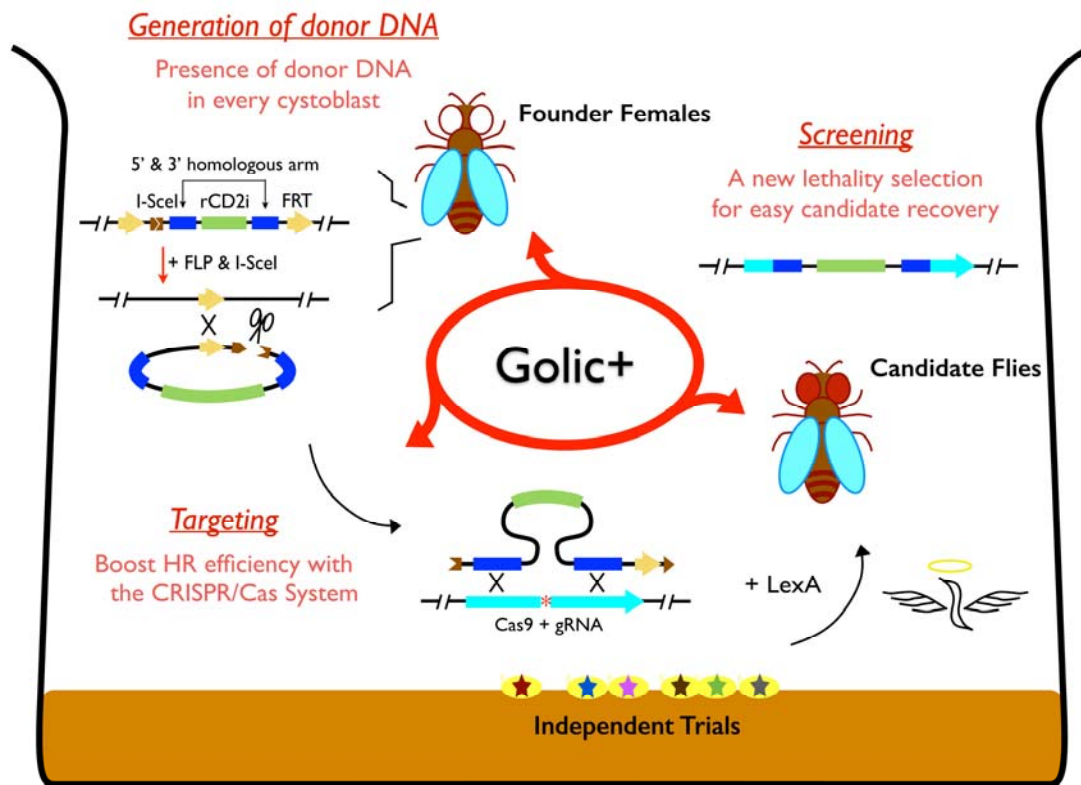

**Figure S4** Golic+

Golic+ founder females can be raised en masse in bottles because the linear donor DNA is released in each cystoblast for independent GT trials. Ends-out GT is greatly boosted by CRISPR/Cas and candidates are selectively recovered via suppression of *nSyb-LexA::p65*-mediated pupal lethality.
